# Supplementary material for: Proteomic Profiling of the Human Fetal Multipotent Mesenchymal Stromal Cells Secretome
Source: Molecules. 2020 Nov 12;25(22):5283. doi: 10.3390/molecules25225283 (PMC7716221; doi:10.3390/molecules25225283)
Supplement: Supplementary file 1 [file molecules-25-05283-s001.xls]

## Sheet: SM Table S1
Supplementary material table S1. Proteins, identified in FetMSCs secretome at least in two biological replicates. Biological processes abbreviations: angiogenesis (An), osteogenesis (Ost), ageing (Ag), apoptosis (Ap), platelet regulation (Plt) and regulation of immune response (IR)
Number	Uniprot	Protein name	Biological process
1	P09486	SPARC	Plt; Ost
2	P02751	Fibronectin	Plt; IR; An
3	P35579	Myosin-9	Plt; IR; An
4	P10909	Clusterin	Plt; IR
5	Q16610	Extracellular matrix protein 1	Plt; An; Ost
6	P05121	Plasminogen activator inhibitor 1	Plt; An
7	P60709	Actin, cytoplasmic 1	Plt
8	O00391	Sulfhydryl oxidase 1	Plt
9	P07602	Prosaposin	Plt
10	Q08380	Galectin-3-binding protein	Plt
11	P04075	Fructose-bisphosphate aldolase A	Plt
12	P62328	Thymosin beta-4	Plt
13	P12814	Alpha-actinin-1	Plt
14	P01023	Alpha-2-macroglobulin	Plt
15	P68871	Hemoglobin subunit beta	Plt
16	O43707	Alpha-actinin-4	Plt
17	P0DP23	Calmodulin-1	Plt
18	O14950	Myosin regulatory light chain 12B	Plt
19	Q9Y490	Talin-1	Plt
20	P21291	Cysteine and glycine-rich protein 1	Plt
21	P12109	Collagen alpha-1(VI) chain	Ost
22	P08253	matrix metallopeptidase 2(MMP2)	Ost
23	P23284	Peptidyl-prolyl cis-trans isomerase B	Ost
24	P35556	Fibrillin-2	Ost
25	P24821	Tenascin	Ost
26	P67936	Tropomyosin alpha-4 chain	Ost
27	P17936	Insulin-like growth factor-binding protein 3	Ost
28	Q9GZX9	Twisted gastrulation protein homolog 1	Ost
29	Q96CG8	Collagen triple helix repeat-containing protein 1	Ost
30	Q15904	V-type proton ATPase subunit S1	Ost
31	O75326	Semaphorin-7A	Ost
32	P52823	Stanniocalcin-1	Ost
33	Q16394	Exostosin-1	Ost
34	Q93063	Exostosin-2	Ost
35	P02452	Collagen alpha-1(I) chain	IR; Ost
36	P03956	Interstitial collagenase	IR
37	P08123	Collagen alpha-2(I) chain	IR
38	P61769	Beta-2-microglobulin	IR
39	P26022	Pentraxin-related protein PTX3	IR
40	P00736	Complement C1r subcomponent	IR
41	Q9BUD6	Spondin-2	IR
42	P62937	Peptidyl-prolyl cis-trans isomerase A	IR
43	P17931	Galectin-3	IR
44	P09871	Complement C1s subcomponent	IR
45	P26038	Moesin	IR
46	Q5KU26	Collectin-12	IR
47	Q95604	HLA class I histocompatibility antigen, Cw-17 alpha chain	IR
48	Q9UNN8	Endothelial protein C receptor	IR
49	P07996	Thrombospondin-1	Ap; Plt
50	P21333	Filamin-A	Ap; Plt
51	P04792	Heat shock protein beta-1	Ap; Plt
52	P02788	Lactotransferrin	Ap; Ost
53	O60565	Gremlin-1	Ap; Ost
54	P16070	CD44 antigen	Ap; IR
55	P0CG48	Polyubiquitin-C	Ap; IR
56	P04083	Annexin A1	Ap; IR
57	P01033	Metalloproteinase inhibitor 1	Ap; Ag; Plt
58	P09211	Glutathione S-transferase P	Ap
59	P11021	Endoplasmic reticulum chaperone BiP	Ap
60	P22392	Nucleoside diphosphate kinase B	Ap
61	P04156	Major prion protein	Ap
62	P23528	Cofilin-1	Ap
63	P63104	14-3-3 protein zeta/delta	Ap
64	P08758	Annexin A5	Ap
65	Q99497	Protein/nucleic acid deglycase DJ-1	Ap
66	P52565	Rho GDP-dissociation inhibitor 1	Ap
67	P04179	Superoxide dismutase [Mn], mitochondrial	Ap
68	P13987	CD59 glycoprotein	Ap
69	P30048	Thioredoxin-dependent peroxide reductase, mitochondrial	Ap
70	Q15582	Transforming growth factor-beta-induced protein ig-h3	An
71	P07355	Annexin A2	An
72	P15144	Aminopeptidase N	An
73	P98160	Basement membrane-specific heparan sulfate proteoglycan core protein	An
74	Q08431	Lactadherin	An
75	Q6UVK1	Chondroitin sulfate proteoglycan 4	An
76	P23381	Tryptophan--tRNA ligase, cytoplasmic	An
77	P05155	Serpin family G member 1(SERPING1)	Ag; Plt; IR
78	P00441	Superoxide dismutase [Cu-Zn]	Ag; Plt
79	P24593	Insulin-like growth factor-binding protein 5	Ag; Ost
80	P29279	Connective tissue growth factor	Ag; An; Ost
81	P16035	Metalloproteinase inhibitor 2	Ag
82	P02461	Collagen alpha-1(III) chain	Ag
83	P36955	Serpin family F member 1(SERPINF1)	Ag
84	P53634	Dipeptidyl peptidase 1	Ag
85	P08670	Vimentin
86	P08254	Stromelysin-1
87	Q15113	Procollagen C-endopeptidase enhancer 1
88	P51884	Lumican
89	P12111	Collagen alpha-3(VI) chain
90	P09382	Galectin-1
91	P12110	Collagen alpha-2(VI) chain
92	Q99715	Collagen alpha-1(XII) chain
93	P23142	Fibulin-1
94	P07858	Cathepsin B
95	P07093	Glia-derived nexin
96	P11047	Laminin subunit gamma-1
97	P02545	Prelamin-A/C
98	Q9Y240	C-type lectin domain family 11 member A
99	Q16363	Laminin subunit alpha-4
100	P06733	Alpha-enolase
101	Q02818	Nucleobindin-1
102	Q13822	Ectonucleotide pyrophosphatase/phosphodiesterase family member 2
103	P07339	Cathepsin D
104	Q12841	Follistatin-related protein 1
105	P22692	Insulin-like growth factor-binding protein 4
106	P28799	Progranulin
107	P00338	L-lactate dehydrogenase A chain
108	P07737	Profilin-1
109	Q6YHK3	CD109 antigen
110	P04406	Glyceraldehyde-3-phosphate dehydrogenase
111	P50454	Serpin H1
112	Q9UBX5	Fibulin-5
113	Q16270	Insulin-like growth factor-binding protein 7
114	Q06830	Peroxiredoxin-1
115	P30101	Protein disulfide-isomerase A3
116	P14618	Pyruvate kinase PKM
117	Q9NRN5	Olfactomedin-like protein 3
118	P62805	Histone H4
119	P01034	Cystatin-C
120	P07711	Cathepsin L1
121	P18669	Phosphoglycerate mutase 1
122	Q6EMK4	Vasorin
123	Q13308	Inactive tyrosine-protein kinase 7
124	Q15293	Reticulocalbin-1
125	P09651	Heterogeneous nuclear ribonucleoprotein A1
126	P28300	Protein-lysine 6-oxidase
127	Q9UBP4	Dickkopf-related protein 3
128	P24592	Insulin-like growth factor-binding protein 6
129	P11142	Heat shock cognate 71 kDa protein
130	P30041	Peroxiredoxin-6
131	P00749	Urokinase-type plasminogen activator
132	Q9HCU0	Endosialin
133	P68104	Elongation factor 1-alpha 1
134	Q15084	Protein disulfide-isomerase A6
135	P06865	Beta-hexosaminidase subunit alpha
136	P07942	Laminin subunit beta-1
137	O14773	Tripeptidyl-peptidase 1
138	P48061	Stromal cell-derived factor 1
139	P35555	Fibrillin-1
140	P15586	N-acetylglucosamine-6-sulfatase
141	Q02809	Procollagen-lysine,2-oxoglutarate 5-dioxygenase 1
142	O95967	EGF-containing fibulin-like extracellular matrix protein 2
143	P22626	Heterogeneous nuclear ribonucleoproteins A2/B1
144	P60660	Myosin light polypeptide 6
145	Q9BRK5	45 kDa calcium-binding protein
146	P62942	Peptidyl-prolyl cis-trans isomerase FKBP1A
147	P30086	Phosphatidylethanolamine-binding protein 1
148	P63313	Thymosin beta-10
149	Q92743	Serine protease HTRA1
150	Q14112	Nidogen-2
151	P40926	Malate dehydrogenase, mitochondrial
152	P00558	Phosphoglycerate kinase 1
153	P10619	Lysosomal protective protein
154	P50395	Rab GDP dissociation inhibitor beta
155	P07237	Protein disulfide-isomerase
156	P20742	Pregnancy zone protein
157	P08133	Annexin A6
158	P04080	Cystatin-B
159	Q01995	Transgelin
160	P37802	Transgelin-2
161	P07686	Beta-hexosaminidase subunit beta
162	P40925	Malate dehydrogenase, cytoplasmic
163	P01893	Putative HLA class I histocompatibility antigen, alpha chain H
164	Q9BRA2	Thioredoxin domain-containing protein 17
165	P55058	Phospholipid transfer protein
166	P36222	Chitinase-3-like protein 1
167	P14543	Nidogen-1
168	Q15149	Plectin
169	P60900	Proteasome subunit alpha type-6
170	O15144	Actin-related protein 2/3 complex subunit 2
171	Q92626	Peroxidasin homolog
172	Q9Y6C2	EMILIN-1
173	Q06828	Fibromodulin
174	P02792	Ferritin light chain
175	P48740	Mannan-binding lectin serine protease 1
176	Q9H299	SH3 domain-binding glutamic acid-rich-like protein 3
177	P29401	Transketolase
178	P63241	Eukaryotic translation initiation factor 5A-1
179	P00505	Aspartate aminotransferase, mitochondrial
180	P62857	40S ribosomal protein S28
181	P31943	Heterogeneous nuclear ribonucleoprotein H
182	O60664	Perilipin-3
183	Q15843	NEDD8
184	Q08397	Lysyl oxidase homolog 1
185	P04062	Lysosomal acid glucosylceramidase
186	P09936	Ubiquitin carboxyl-terminal hydrolase isozyme L1
187	P16949	Stathmin
188	P26447	Protein S100-A4
189	O60888	Protein CutA
190	Q8N6G6	ADAMTS-like protein 1
191	P54727	UV excision repair protein RAD23 homolog B
192	Q7Z7G0	Target of Nesh-SH3
193	Q6NZI2	Caveolae-associated protein 1
194	Q05682	Caldesmon
195	Q6IBS0	Twinfilin-2
196	P31949	Protein S100-A11
197	Q09666	Neuroblast differentiation-associated protein AHNAK
198	Q16555	Dihydropyrimidinase-related protein 2
199	P30050	60S ribosomal protein L12
200	P07108	Acyl-CoA-binding protein
201	Q9NRR1	Cytokine-like protein 1
202	Q9ULV4	Coronin-1C
203	Q4LDE5	Sushi, von Willebrand factor type A, EGF and pentraxin domain-containing protein 1
204	O75787	Renin receptor
205	P19021	Peptidyl-glycine alpha-amidating monooxygenase
206	Q8NBJ4	Golgi membrane protein 1
207	P18206	Vinculin
208	P68363	Tubulin alpha-1B chain
209	Q16881	Thioredoxin reductase 1, cytoplasmic
210	Q16881	Syntenin-1
211	O75368	SH3 domain-binding glutamic acid-rich-like protein
212	O75635	Serpin B7
213	P35080	Profilin-2
214	Q10471	Polypeptide N-acetylgalactosaminyltransferase 2
215	Q86UD1	Out at first protein homolog
216	O60568	Multifunctional procollagen lysine hydroxylase and glycosyltransferase LH3
217	P50281	Matrix metalloproteinase-14
218	P14174	Macrophage migration inhibitory factor
219	Q9Y4K0	Lysyl oxidase homolog 2
220	P07910	Heterogeneous nuclear ribonucleoproteins C1/C2
221	P69905	Hemoglobin subunit alpha
222	O14558	Heat shock protein beta-6
223	P0DMV8	Heat shock 70 kDa protein 1A
224	P17900	Ganglioside GM2 activator
225	Q14315	Filamin-C
226	P47756	F-actin-capping protein subunit beta
227	P13639	Elongation factor 2
228	P26641	Elongation factor 1-gamma
229	Q13443	Disintegrin and metalloproteinase domain-containing protein 9
230	O14672	Disintegrin and metalloproteinase domain-containing protein 10
231	A6NHG4	D-dopachrome decarboxylase-like protein
232	P99999	Cytochrome c
233	Q76M96	Coiled-coil domain-containing protein 80
234	P49720	Proteasome subunit beta type-3
235	P60174	Triosephosphate isomerase
236	P02649	Apolipoprotein E

## Sheet: SM Table S2
Supplementary material table S2. Results of protein identification in four FetMSCs replicates. Only valid proteins are represented.
			Unused score				Sc summ				Pep intensity summ
Accession	Description	Sequence length	1	2	3	4	1	2	3	4	1	2	3	4
sp|P31946|1433B_HUMAN	14-3-3 protein beta/alpha	246				2				28				7612.01
sp|P62258|1433E_HUMAN	14-3-3 protein epsilon	255		2				21				8626.47
sp|P61981|1433G_HUMAN	14-3-3 protein gamma	247				2.75				33				9019.12
sp|P63104|1433Z_HUMAN	14-3-3 protein zeta/delta	245		5.2	3.03	7.28		33	19	49		7009.8	3088.48	10173.5
sp|P62857|RS28_HUMAN	40S ribosomal protein S28	69	2	2	2.02	2	15	14	13	14	2055.15	3114.71	3739.22	1858.33
sp|Q9BRK5|CAB45_HUMAN	45 kDa calcium-binding protein	362		4.75	3.33	7.41		38	18	52		7983.75	4921.81	12589.2
sp|P08195|4F2_HUMAN	4F2 cell-surface antigen heavy chain	630			2.52				11				1825.98
sp|P05387|RLA2_HUMAN	60S acidic ribosomal protein P2	115		2.53				12				506.373
sp|P30050|RL12_HUMAN	60S ribosomal protein L12	165		2		2		14		14		1093.87		985.784
sp|P08253|MMP2_HUMAN	72 kDa type IV collagenase	660	28.29	39.06	38.27	43.61	333	505	494	537	396774	398730	375772	364960
sp|P60709|ACTB_HUMAN	Actin, cytoplasmic 1	375	14.92	20.26	27.18	27.42	150	234	404	299	118994	199703	330143	256573
sp|P63261|ACTG_HUMAN	Actin, cytoplasmic 2	375			2				392				328571
sp|P61160|ARP2_HUMAN	Actin-related protein 2	394			2				12				1070.1
sp|O15144|ARPC2_HUMAN	Actin-related protein 2/3 complex subunit 2	300	2.38		4		10		26		1864.71		5653.68
sp|P07108|ACBP_HUMAN	Acyl-CoA-binding protein	87		2.08		2.39		12		12		1307.11		701.226
sp|Q8N6G6|ATL1_HUMAN	ADAMTS-like protein 1	1762	2		2		12		11		1831.86		1487.26
sp|P54819|KAD2_HUMAN	Adenylate kinase 2, mitochondrial	239			1.6				8				958.578
sp|Q8IUX7|AEBP1_HUMAN	Adipocyte enhancer-binding protein 1	1158		5.64				35				2842.4
sp|P35318|ADML_HUMAN	ADM	185			1.59				9				2430.64
sp|P14550|AK1A1_HUMAN	Aldo-keto reductase family 1 member A1	325			1.66				9				1412.99
sp|P15121|ALDR_HUMAN	Aldo-keto reductase family 1 member B1	316			1.54				7				508.824
sp|P02765|FETUA_HUMAN	Alpha-2-HS-glycoprotein	367				2.2				31				30344.1
sp|P01023|A2MG_HUMAN	Alpha-2-macroglobulin	1474	4.11	2.1	7.9	2.05	60	27	148	13	36737.5	2347.79	63620.4	1841.67
sp|P12814|ACTN1_HUMAN	Alpha-actinin-1	892		17.62		3.89		119		126		25648.8		29827.9
sp|O43707|ACTN4_HUMAN	Alpha-actinin-4	911	4.68	4.89	1.75	19.24	28	97	12	132	5587.25	25988.7	1894.61	36808.3
sp|P06733|ENOA_HUMAN	Alpha-enolase	434	8.21	8.62	16.33	14.02	47	97	151	115	10824	45394.6	72525.7	42043.4
sp|P15144|AMPN_HUMAN	Aminopeptidase N	967	7.35	4.81	8.51	5.98	43	30	63	30	12972.3	6532.11	18978.9	4141.91
sp|Q9UKU9|ANGL2_HUMAN	Angiopoietin-related protein 2	493			1.47				10				1512.01
sp|P04083|ANXA1_HUMAN	Annexin A1	346		3.62	7.2	2.07		24	49	11		3208.33	8891.18	689.461
sp|P07355|ANXA2_HUMAN	Annexin A2	339	9.71	18.75	9.98	19.69	61	138	87	120	6863.48	35569.6	7910.78	39773
sp|P08758|ANXA5_HUMAN	Annexin A5	320		6.9		4.16		33		32		7666.42		4903.19
sp|P08133|ANXA6_HUMAN	Annexin A6	673		9.81		5.89		60		31		8157.11		3276.72
sp|P02649|APOE_HUMAN	Apolipoprotein E	317			7.43	2.04			57	12			18237	668.873
sp|P15289|ARSA_HUMAN	Arylsulfatase A	507		2				9				384.314
sp|P00505|AATM_HUMAN	Aspartate aminotransferase, mitochondrial	430	2.11		2.01		11		14		2161.76		3448.28
sp|P06576|ATPB_HUMAN	ATP synthase subunit beta, mitochondrial	529			2.35				12				1339.95
sp|Q676U5|A16L1_HUMAN	Autophagy-related protein 16-1	607	2				10				1401.96
sp|P98160|PGBM_HUMAN	Basement membrane-specific heparan sulfate proteoglycan core protein	4391	6.7	2.59	4.41		47	14	18		17486.8	5940.2	2328.43
sp|P61769|B2MG_HUMAN	Beta-2-microglobulin	119	6.16	5.73	8.33	10.26	70	75	86	98	71151	44084.3	32984.1	118635
sp|P16278|BGAL_HUMAN	Beta-galactosidase	677		4.09				18				2209.56
sp|P06865|HEXA_HUMAN	Beta-hexosaminidase subunit alpha	529	6.27	8.55	6.52	3.24	29	59	32	19	10899.5	22110.5	4278.92	9029.9
sp|P07686|HEXB_HUMAN	Beta-hexosaminidase subunit beta	556	2.13	3.89	7.47	7.01	11	22	47	44	2022.3	5511.27	6210.54	6596.81
sp|Q9H3K6|BOLA2_HUMAN	BolA-like protein 2	86			2.07				14				653.186
sp|P55290|CAD13_HUMAN	Cadherin-13	713		2.46				10				1282.11
sp|Q05682|CALD1_HUMAN	Caldesmon	793	2	2	2.01	2	10	9	9	9	862.5	1600	916.177	1906.62
sp|P0DP23|CALM1_HUMAN	Calmodulin-1	149		4.05		4.73		34		41		9516.42		8329.9
sp|P04632|CPNS1_HUMAN	Calpain small subunit 1	268			2				12				913.235
sp|O43852|CALU_HUMAN	Calumenin	315				4.25				28				6645.77
sp|P07858|CATB_HUMAN	Cathepsin B	339	10.94	21.55	22.47	21.61	118	280	312	315	36929.7	111694	173914	117744
sp|P07339|CATD_HUMAN	Cathepsin D	412		14.46	15.11	14.17		90	94	79		31131.9	43413	31383.6
sp|P43235|CATK_HUMAN	Cathepsin K	329		2.01				9				238.487
sp|P07711|CATL1_HUMAN	Cathepsin L1	333		4.39	2	4.27		26	10	38		23286.8	2168.63	26702.2
sp|Q6NZI2|CAVN1_HUMAN	Caveolae-associated protein 1	390		2.01	2	2		14	14	16		1680.39	1146.32	1198.28
sp|P48745|CCN3_HUMAN	CCN family member 3	357				1.67				8				1202.45
sp|Q6YHK3|CD109_HUMAN	CD109 antigen	1445	10.75	12.02	23.83	10.7	74	83	157	55	13022.6	16181.6	61927.5	17697.3
sp|P16070|CD44_HUMAN	CD44 antigen	742		3.8	2.75	2.94		37	14	37		15144.9	2962.5	12779.2
sp|P13987|CD59_HUMAN	CD59 glycoprotein	128	2		1.77		15		9		2587.99		4383.09
sp|P36222|CH3L1_HUMAN	Chitinase-3-like protein 1	383	3.21	4.58	4.23	4.06	19	28	31	20	4068.63	5978.19	4283.58	3557.6
sp|O00299|CLIC1_HUMAN	Chloride intracellular channel protein 1	241				3.16				10				617.561
sp|Q9Y696|CLIC4_HUMAN	Chloride intracellular channel protein 4	253			2.2				8				1292.89
sp|Q6UVK1|CSPG4_HUMAN	Chondroitin sulfate proteoglycan 4	2322		5.85		6.62		31		33		2311.03		2100.98
sp|P10909|CLUS_HUMAN	Clusterin	449	5.24	4.55	9.24	4.14	33	28	93	40	9298.77	7838.48	17776.2	8208.82
sp|P23528|COF1_HUMAN	Cofilin-1	166	6	2.86	9.74	4.01	38	13	63	52	10934.8	4067.89	18343.4	11544.4
sp|Q76M96|CCD80_HUMAN	Coiled-coil domain-containing protein 80	950		2.47		2.01		8		8		867.892		662.255
sp|P02452|CO1A1_HUMAN	Collagen alpha-1(I) chain	1464	50.85	54.76	63.01	56.76	857	1162	1169	1014	551650	455950	396632	538812
sp|P02461|CO3A1_HUMAN	Collagen alpha-1(III) chain	1466	8.06	18.64	21.04	20.78	67	381	154	232	19067.2	94321.5	42038	62139.2
sp|P20908|CO5A1_HUMAN	Collagen alpha-1(V) chain	1838		3.48				29				3515.44
sp|P12109|CO6A1_HUMAN	Collagen alpha-1(VI) chain	1028	30.76	36.76	32.47	44.19	343	432	294	527	504754	515851	243937	663221
sp|Q99715|COCA1_HUMAN	Collagen alpha-1(XII) chain	3063		67.5		51.48		500		369		156467		94131.6
sp|P08123|CO1A2_HUMAN	Collagen alpha-2(I) chain	1366	92.05	88.9	89.2	104.92	2068	2263	2341	2263	1.43895e+06	1.45811e+06	987828	1.32328e+06
sp|P12110|CO6A2_HUMAN	Collagen alpha-2(VI) chain	1019	11.81	28.87	27.23	36.89	107	351	269	362	110774	173042	99653.7	168313	\
sp|P12111|CO6A3_HUMAN	Collagen alpha-3(VI) chain	3177	39.15	104.33	56.5	112.16	190	843	346	915	52743.1	363330	77618.6	329909
sp|Q96CG8|CTHR1_HUMAN	Collagen triple helix repeat-containing protein 1	243		3.49	1.19	3.44		37	12	15		5944.12	664.706	1478.43
sp|Q5KU26|COL12_HUMAN	Collectin-12	742	2		2		9		11		9168.63		5755.88
sp|P00736|C1R_HUMAN	Complement C1r subcomponent	705	4.25	17.14		19.86	19	147		146	4183.58	45295.1		41123
sp|P09871|C1S_HUMAN	Complement C1s subcomponent	688	2.56	11.02		11.28	11	78		67	7254.41	18978.9		15877
sp|P29279|CTGF_HUMAN	Connective tissue growth factor	349	4.03		1.96		25		10		4961.52		2709.8
sp|Q9ULV4|COR1C_HUMAN	Coronin-1C	474		2	2.03	2		10	11	11		855.637	652.941	1235.78
sp|Q9Y240|CLC11_HUMAN	C-type lectin domain family 11 member A	323		13.11		7.59		98		54		63979.4		21973.3
sp|Q9UBG0|MRC2_HUMAN	C-type mannose receptor 2	1479				3.28				27				2932.88
sp|P04080|CYTB_HUMAN	Cystatin-B	98	2	2.03	2.59	2	13	15	24	11	3124.51	5392.16	6697.36	6359.56
sp|P01034|CYTC_HUMAN	Cystatin-C	146	3.96	2.47	8.07	11.92	24	17	71	70	11143.1	9006.62	29310.5	20261.5
sp|P21291|CSRP1_HUMAN	Cysteine and glycine-rich protein 1	193		2		2		14		12		1774.76		1762.5
sp|P99999|CYC_HUMAN	Cytochrome c	105	2			2	12			14	6418.14			2154.17
sp|Q9NRR1|CYTL1_HUMAN	Cytokine-like protein 1	136	1.57	2	1.82	2	9	11	9	11	711.274	902.206	1270.34	880.392
sp|Q6UVY6|MOXD1_HUMAN	DBH-like monooxygenase protein 1	613		1.75				9				3517.89
sp|A6NHG4|DDTL_HUMAN	D-dopachrome decarboxylase-like protein	134		1.17	2			20	23			2741.18	3439.46
sp|P07585|PGS2_HUMAN	Decorin	359		4.02				30				9635.29
sp|Q9UBP4|DKK3_HUMAN	Dickkopf-related protein 3	350		6.01		6.58		58		57		13745.6		15231.6
sp|Q16555|DPYL2_HUMAN	Dihydropyrimidinase-related protein 2	572		2.16	2.12	4.22		22	33	22		1028.68	1156.37	1113.48
sp|P53634|CATC_HUMAN	Dipeptidyl peptidase 1	463		1.72		2		10		12		3098.04		2802.94
sp|O14672|ADA10_HUMAN	Disintegrin and metalloproteinase domain-containing protein 10	748			2.03	3.97			17	17			9351.23	6027.21
sp|Q13443|ADAM9_HUMAN	Disintegrin and metalloproteinase domain-containing protein 9	819			1.71	2.48			9	18			2284.8	3909.31
sp|P27695|APEX1_HUMAN	DNA-(apurinic or apyrimidinic site) lyase	318			2				9				939.706
sp|Q13561|DCTN2_HUMAN	Dynactin subunit 2	401			2				9				834.559
sp|Q14118|DAG1_HUMAN	Dystroglycan	895			2.21				12				509.314
sp|P22413|ENPP1_HUMAN	Ectonucleotide pyrophosphatase/phosphodiesterase family member 1	925		2				12				738.235
sp|Q13822|ENPP2_HUMAN	Ectonucleotide pyrophosphatase/phosphodiesterase family member 2	863	15.15	12.91	22.92	25.94	93	74	174	144	34408.6	27264.5	61259.1	34698.8
sp|O95967|FBLN4_HUMAN	EGF-containing fibulin-like extracellular matrix protein 2	443	3.65	4.37		9.51	21	42		58	3157.84	8410.05		16150.7
sp|P68104|EF1A1_HUMAN	Elongation factor 1-alpha 1	462	3.46		6.32	1.64	24		66	24	11072.1		17313.2	6692.89
sp|P26641|EF1G_HUMAN	Elongation factor 1-gamma	437			2.14	2.02			8	10			7844.85	5481.86
sp|P13639|EF2_HUMAN	Elongation factor 2	858		2		2.43		8		9		1469.12		1954.9
sp|Q9Y6C2|EMIL1_HUMAN	EMILIN-1	1016		2.75		2.98		14		21		3837.99		3333.33
sp|P11021|BIP_HUMAN	Endoplasmic reticulum chaperone BiP	654		12.81		21.53		86		133		32430.2		43158.8
sp|P14625|ENPL_HUMAN	Endoplasmin	803		2.24				13				769.118
sp|Q9HCU0|CD248_HUMAN	Endosialin	757		4.38		6.04		26		35		11959.3		13561.8
sp|Q9UNN8|EPCR_HUMAN	Endothelial protein C receptor	238		4.29		4.03		19		20		4054.9		3689.46
sp|Q14240|IF4A2_HUMAN	Eukaryotic initiation factor 4A-II	407			2.04				11				1593.38
sp|P63241|IF5A1_HUMAN	Eukaryotic translation initiation factor 5A-1	154		2	2	2		33	16	16		3350.24	2510.78	3174.26
sp|Q16394|EXT1_HUMAN	Exostosin-1	746		2.74		2.05		13		13		1053.43		629.412
sp|Q93063|EXT2_HUMAN	Exostosin-2	718		2		2		10		10		464.461		503.676
sp|Q16610|ECM1_HUMAN	Extracellular matrix protein 1	540	16.23	16.32	18.59	18.41	126	165	162	132	61807.1	55302.9	62988.2	43736.3
sp|P52907|CAZA1_HUMAN	F-actin-capping protein subunit alpha-1	286			4.28				34				1627.21
sp|P47756|CAPZB_HUMAN	F-actin-capping protein subunit beta	277			2.12	2			10	11			2123.28	1220.83
sp|P14324|FPPS_HUMAN	Farnesyl pyrophosphate synthase	419			3.92				20				2384.07
sp|Q16658|FSCN1_HUMAN	Fascin	493			3.52				18				5180.88
sp|P02792|FRIL_HUMAN	Ferritin light chain	175	4.5	2.02	6		19	9	35		4070.1	931.863	4971.57
sp|P35555|FBN1_HUMAN	Fibrillin-1	2871	4.26	12.58	5.46	8.66	22	74	33	73	4450	14119.6	4033.09	19558.3
sp|P35556|FBN2_HUMAN	Fibrillin-2	2912	2.63	19.19		30.91	8	123		190	5505.39	28664.2		48108.8
sp|Q06828|FMOD_HUMAN	Fibromodulin	376	2.26		3.82		9		26		740.196		6034.07
sp|P02751|FINC_HUMAN	Fibronectin	2386	125.87	147.33	142.84	176.61	1636	2558	2021	2844	2.18728e+06	2.50746e+06	1.78983e+06	3.11153e+06
sp|P23142|FBLN1_HUMAN	Fibulin-1	703	8.74	25.97	3	31.43	43	260	20	319	18737.7	184104	2454.9	245221
sp|Q9UBX5|FBLN5_HUMAN	Fibulin-5	448	7.16	2	8.95	2.03	45	12	72	11	42035.8	9240.93	39351	7208.82
sp|P21333|FLNA_HUMAN	Filamin-A	2647	2.53	15.68	22.32	20.62	12	103	155	105	2698.04	19504	34405.4	24383.5
sp|Q14315|FLNC_HUMAN	Filamin-C	2725			6.01	2.08			36	23			6126.96	4569.85
sp|Q12841|FSTL1_HUMAN	Follistatin-related protein 1	308	10.78	13.02	3.86	12.55	73	125	23	117	30450.2	43988.7	8134.31	56782.6
sp|P04075|ALDOA_HUMAN	Fructose-bisphosphate aldolase A	364	4.05	12.01	13.34	11.99	33	97	125	136	11768.1	17424.5	55619.6	37620.6
sp|P09382|LEG1_HUMAN	Galectin-1	135	10.03	11.77	15.52	14.02	137	138	225	219	118602	114034	235300	191183
sp|P17931|LEG3_HUMAN	Galectin-3	250	4.08	6.54	6.05	6.07	25	72	79	64	8940.44	31501.5	33745.3	27832.6
sp|Q08380|LG3BP_HUMAN	Galectin-3-binding protein	585	7.77	12.64	8.24	10.83	49	92	63	70	23159.3	59284.3	35737.5	27438.7
sp|Q92820|GGH_HUMAN	Gamma-glutamyl hydrolase	318			2				11				1016.42
sp|P17900|SAP3_HUMAN	Ganglioside GM2 activator	193			2.1	2.03			11	11			454.214	442.462
sp|P07093|GDN_HUMAN	Glia-derived nexin	398	13.26	24.83	20.3	32.19	108	282	141	261	54949	104365	61232.1	161318
sp|Q16769|QPCT_HUMAN	Glutaminyl-peptide cyclotransferase	361	2.07				11				1054.9
sp|P09211|GSTP1_HUMAN	Glutathione S-transferase P	210	4	10.29	12.12	10.19	40	82	121	101	15526.7	44413.5	61043.4	43231.6
sp|P04406|G3P_HUMAN	Glyceraldehyde-3-phosphate dehydrogenase	335	2.41	8.26	9.84	8.51	10	71	108	62	4228.19	31527.2	47947.1	23966.9
sp|Q8NBJ4|GOLM1_HUMAN	Golgi membrane protein 1	401		2		2.05		15		13		534.069		502.206
sp|O60565|GREM1_HUMAN	Gremlin-1	184		4		5.04		30		38		12963.7		5507.6
sp|P0DMV8|HS71A_HUMAN	Heat shock 70 kDa protein 1A	641			1.08	2			13	43			1784.56	20929.9
sp|P11142|HSP7C_HUMAN	Heat shock cognate 71 kDa protein	646	2.08	8.32	5.39	9.86	10	55	35	94	968.873	13145.6	6403.68	36198.5
sp|P04792|HSPB1_HUMAN	Heat shock protein beta-1	205	2	4.65	6	3.53	10	28	36	24	1009.8	6997.79	7099.51	6238.97
sp|O14558|HSPB6_HUMAN	Heat shock protein beta-6	160			2	2.03			11	13			1883.82	1665.44
sp|P69905|HBA_HUMAN	Hemoglobin subunit alpha	142		4		2.04		29		10		4631.37		2293.87
sp|P68871|HBB_HUMAN	Hemoglobin subunit beta	147		4.01		3.13		34		52		16831.4		18436.3
sp|P09651|ROA1_HUMAN	Heterogeneous nuclear ribonucleoprotein A1	372		5.82	6.2	11.94		74	64	89		8774.51	16500.5	19176.7
sp|P31943|HNRH1_HUMAN	Heterogeneous nuclear ribonucleoprotein H	449	3.03		2.54		17		9		3872.55		1085.29
sp|P61978|HNRPK_HUMAN	Heterogeneous nuclear ribonucleoprotein K	463				2.96				17				2126.23
sp|P22626|ROA2_HUMAN	Heterogeneous nuclear ribonucleoproteins A2/B1	353	3.78	11.85	13.12	5.64	18	84	82	66	2727.7	10067.2	12363	10962
sp|P07910|HNRPC_HUMAN	Heterogeneous nuclear ribonucleoproteins C1/C2	306			2	2			12	9			2547.79	2349.76
sp|P16104|H2AX_HUMAN	Histone H2AX	143			4.72				25				35553.2
sp|P62805|H4_HUMAN	Histone H4	103	1.5	4.94	6	3.62	9	26	51	20	4680.39	12518.9	45526.5	8130.64
sp|Q95604|1C17_HUMAN	HLA class I histocompatibility antigen, Cw-17 alpha chain	372	1.33	5.86	6.02	5.4	8	34	40	28	1533.82	11249.8	7921.73	3488.12
sp|Q13308|PTK7_HUMAN	Inactive tyrosine-protein kinase 7	1070	6.6	11.2	8.01	11.59	42	68	62	58	15619.1	15952.2	20600.2	15075.2
sp|P18065|IBP2_HUMAN	Insulin-like growth factor-binding protein 2	325			2.08				9				567.402
sp|P17936|IBP3_HUMAN	Insulin-like growth factor-binding protein 3	291		4.59		3.65		29		19		4962.23		3325.27
sp|P22692|IBP4_HUMAN	Insulin-like growth factor-binding protein 4	258	9.05	8.19	8.6	11.46	78	96	94	118	41965.9	32754.4	20824.6	43160.8
sp|P24593|IBP5_HUMAN	Insulin-like growth factor-binding protein 5	272	1.83	4	2.21	2.52	9	39	13	14	9386.03	7508.25	1679.9	544.442
sp|P24592|IBP6_HUMAN	Insulin-like growth factor-binding protein 6	240	4	2.98	4	6	30	25	46	56	6902.7	12869.4	9434.31	28079
sp|Q16270|IBP7_HUMAN	Insulin-like growth factor-binding protein 7	282	8.57	9.07		9.11	47	58		60	27497.1	21161.3		22630.2
sp|P03956|MMP1_HUMAN	Interstitial collagenase	469	43.41	48.99	42.4	57.73	792	1190	898	1241	1.35518e+06	2.28533e+06	1.40167e+06	2.37266e+06
sp|P78386|KRT85_HUMAN	Keratin, type II cuticular Hb5	507				5.01				25				11347.3
sp|Q08431|MFGM_HUMAN	Lactadherin	387		4.03	3.59	4.11		26	20	21		6591.42	2931.62	4573.77
sp|P02788|TRFL_HUMAN	Lactotransferrin	710	5.1	2	6.16		69	10	71		94401	9355.88	57718.9
sp|Q04760|LGUL_HUMAN	Lactoylglutathione lyase	184			1.35				8				2115.2
sp|Q16363|LAMA4_HUMAN	Laminin subunit alpha-4	1823		19.03		21.97		161		141		45982.1		39688.2
sp|P07942|LAMB1_HUMAN	Laminin subunit beta-1	1786		13.69		7.97		102		49		15023.9		8032.6
sp|P11047|LAMC1_HUMAN	Laminin subunit gamma-1	1609		17.1		16.68		188		153		51660.8		45346.6
sp|P00338|LDHA_HUMAN	L-lactate dehydrogenase A chain	332	3.86	9.42	20.76	10.37	19	59	140	59	5432.11	9402.7	75469.4	30721.1
sp|P07195|LDHB_HUMAN	L-lactate dehydrogenase B chain	334			4.87				49				14336.8
sp|P51884|LUM_HUMAN	Lumican	338	13.44	14.19	15.25	16.28	107	165	122	152	182046	282039	223306	214684
sp|P04062|GLCM_HUMAN	Lysosomal acid glucosylceramidase	536		2		2.04		14		13		1582.11		2467.65
sp|P10619|PPGB_HUMAN	Lysosomal protective protein	480		6.1	5.04	6.17		40	32	41		9598.77	1627.7	8610.78
sp|P13473|LAMP2_HUMAN	Lysosome-associated membrane glycoprotein 2	410				1.77				12				3250.98
sp|Q08397|LOXL1_HUMAN	Lysyl oxidase homolog 1	574		3.57	2.01	1.93		21	11	10		3205.64	1771.08	1569.61
sp|Q9Y4K0|LOXL2_HUMAN	Lysyl oxidase homolog 2	774	1.67			2.06	7			9	831.863			1151.96
sp|P14174|MIF_HUMAN	Macrophage migration inhibitory factor	115		2	4			14	40			24410.3	47035.1
sp|P04156|PRIO_HUMAN	Major prion protein	253	4		3.09		26		23		11027.9		13007.1
sp|P40925|MDHC_HUMAN	Malate dehydrogenase, cytoplasmic	334	2.05	1.46	5.53	2.59	10	9	46	10	2382.84	2340.44	12886.3	2465.44
sp|P40926|MDHM_HUMAN	Malate dehydrogenase, mitochondrial	338	2.23		8.48	3.1	13		45	18	3261.52		13249	4517.65
sp|P48740|MASP1_HUMAN	Mannan-binding lectin serine protease 1	699		4.98		4		37		21		3756		2892.71
sp|P33908|MA1A1_HUMAN	Mannosyl-oligosaccharide 1,2-alpha-mannosidase IA	653			2.08				9				873.774
sp|P50281|MMP14_HUMAN	Matrix metalloproteinase-14	582		2.01	2.01			12	11			4542.4	1782.35
sp|Q9BRK3|MXRA8_HUMAN	Matrix remodeling-associated protein 8	442				1.5				11				1940.93
sp|P01033|TIMP1_HUMAN	Metalloproteinase inhibitor 1	207	10	14.96	8.33	10.95	110	218	117	147	197664	221608	140158	177329
sp|P16035|TIMP2_HUMAN	Metalloproteinase inhibitor 2	220	14.12	8.32	12.4	7.71	184	135	165	79	107895	74725	108551	62781.4
sp|P55083|MFAP4_HUMAN	Microfibril-associated glycoprotein 4	255				2.7				13				2108.33
sp|Q15691|MARE1_HUMAN	Microtubule-associated protein RP/EB family member 1	268			2				11				1162.74
sp|O60336|MABP1_HUMAN	Mitogen-activated protein kinase-binding protein 1	1514		1.2				10				695.588
sp|P26038|MOES_HUMAN	Moesin	577		6.2		3.6		42		26		14181.6		9373.53
sp|O60568|PLOD3_HUMAN	Multifunctional procollagen lysine hydroxylase and glycosyltransferase LH3	738	1.12			2.38	10			9	2514.46			1438.72
sp|Q969H8|MYDGF_HUMAN	Myeloid-derived growth factor	173			4				18				4084.56
sp|P60660|MYL6_HUMAN	Myosin light polypeptide 6	151	3.96	5.73	6.02	5.82	18	30	29	28	2645.1	12967.4	9249.02	11067.4
sp|O14950|ML12B_HUMAN	Myosin regulatory light chain 12B	172		3.19		2.61		22		13		12365		5275.24
sp|P24844|MYL9_HUMAN	Myosin regulatory light polypeptide 9	172				1.85				10				2217.89
sp|P35579|MYH9_HUMAN	Myosin-9	1960		8.63	3.42	3.84		70	26	23		7470.34	3469.85	1107.11
sp|P29966|MARCS_HUMAN	Myristoylated alanine-rich C-kinase substrate	332				2				11				988.48
sp|Q9UJJ9|GNPTG_HUMAN	N-acetylglucosamine-1-phosphotransferase subunit gamma	305		3.68				23				1853.19
sp|P15586|GNS_HUMAN	N-acetylglucosamine-6-sulfatase	552	5.32		4.17		30		24		10055.6		9246.08
sp|Q15843|NEDD8_HUMAN	NEDD8	81	1.55		2	2	10		12	12	2664.46		2856.86	1211.52
sp|P48681|NEST_HUMAN	Nestin	1621			1.64				11				662.5
sp|Q09666|AHNK_HUMAN	Neuroblast differentiation-associated protein AHNAK	5890		2.06	3.37	2.06		10	18	9		1052.94	1632.84	817.402
sp|P14543|NID1_HUMAN	Nidogen-1	1247		8.19		4.35		29		25		5226.72		3186.03
sp|Q14112|NID2_HUMAN	Nidogen-2	1375		5.35		8.04		47		48		9199.26		5116.42
sp|P61916|NPC2_HUMAN	NPC intracellular cholesterol transporter 2	151				1.49				9				1616.91
sp|Q02818|NUCB1_HUMAN	Nucleobindin-1	461		22.63		17.84		149		122		43423.3		41664.7
sp|P22392|NDKB_HUMAN	Nucleoside diphosphate kinase B	152	6.33	4.04	5.36	8.36	31	21	33	48	27038.7	10454.7	63598.5	38689.2
sp|Q9NRN5|OLFL3_HUMAN	Olfactomedin-like protein 3	406	5.69	6.01	1.95	7.83	30	42	9	47	15957.1	29057.4	859.314	26580.6
sp|Q86UD1|OAF_HUMAN	Out at first protein homolog	273		2.01	1.77	2		9	8	11		5795.59	4287.5	6526.47
sp|Q9NR12|PDLI7_HUMAN	PDZ and LIM domain protein 7	457			1.7				9				2074.51
sp|P26022|PTX3_HUMAN	Pentraxin-related protein PTX3	381		7.82		10.19		41		74		25680.9		39378.9
sp|P19021|AMD_HUMAN	Peptidyl-glycine alpha-amidating monooxygenase	973		2.46		2.07		10		15		489.951		908.823
sp|P62937|PPIA_HUMAN	Peptidyl-prolyl cis-trans isomerase A	165	8.66	10.68	11.64	9.93	38	82	69	76	10544.1	25834.1	45446.8	24911.3
sp|P23284|PPIB_HUMAN	Peptidyl-prolyl cis-trans isomerase B	216	5.36	10.71	6.76	11.44	31	67	35	73	6833.58	33323	20250.5	49829.9
sp|Q96AY3|FKB10_HUMAN	Peptidyl-prolyl cis-trans isomerase FKBP10	582				2.03				10				880.392
sp|P62942|FKB1A_HUMAN	Peptidyl-prolyl cis-trans isomerase FKBP1A	108	4	2.37	2.27	2	24	11	18	12	11603.7	5807.35	11069.6	5294.12
sp|Q00688|FKBP3_HUMAN	Peptidyl-prolyl cis-trans isomerase FKBP3	224			2.01				16				795.833
sp|O60664|PLIN3_HUMAN	Perilipin-3	434		2.5	3.93	3.62		11	20	19		681.618	2196.81	4347.79
sp|Q92626|PXDN_HUMAN	Peroxidasin homolog	1479		7.28	2.01	11.17		32	11	68		4296.3	525.49	6102.97
sp|Q06830|PRDX1_HUMAN	Peroxiredoxin-1	199	8.02	4.14	8.76	6.52	43	32	57	41	26986.8	16297.5	33309.3	15427.2
sp|P32119|PRDX2_HUMAN	Peroxiredoxin-2	198				2				26				5563.48
sp|P30041|PRDX6_HUMAN	Peroxiredoxin-6	224	3.45	8.05	7.48	6.6	20	46	46	46	13001.7	15238	10877.2	15652.5
sp|P30086|PEBP1_HUMAN	Phosphatidylethanolamine-binding protein 1	187	2	4	6	4	9	18	36	18	4142.4	9218.87	12940	7292.89
sp|P00558|PGK1_HUMAN	Phosphoglycerate kinase 1	417	3.2	4.59	11.68	6.01	19	40	78	42	4445.34	4635.29	13427	4683.82
sp|P18669|PGAM1_HUMAN	Phosphoglycerate mutase 1	254		5.79	14.27	7.35		33	127	39		7602.94	33865.7	10412.5
sp|Q8IV08|PLD3_HUMAN	Phospholipase D3	490		2.12				9				3009.31
sp|P55058|PLTP_HUMAN	Phospholipid transfer protein	493		3.5	5.23	8.17		23	33	48		2369.12	4404.66	7627.7
sp|P36955|PEDF_HUMAN	Pigment epithelium-derived factor	418	8.29	11.68	10.81	11.16	45	91	84	104	27391.7	69929.7	53162	43729.4
sp|P05155|IC1_HUMAN	Plasma protease C1 inhibitor	500		4	3.05	4		25	20	26		5874.76	2574.51	4028.43
sp|P05121|PAI1_HUMAN	Plasminogen activator inhibitor 1	402	22.08	10.38	20.07	12.28	182	66	155	79	206695	23113.2	125710	37717.9
sp|Q8NC51|PAIRB_HUMAN	Plasminogen activator inhibitor 1 RNA-binding protein	408			2				12				1743.63
sp|P13797|PLST_HUMAN	Plastin-3	630			2.1				12				1773.04
sp|Q15149|PLEC_HUMAN	Plectin	4684		5.16	9.79	4.89		26	59	25		1786.76	8948.04	1791.67
sp|P11940|PABP1_HUMAN	Polyadenylate-binding protein 1	636				1.67				9				825
sp|Q10471|GALT2_HUMAN	Polypeptide N-acetylgalactosaminyltransferase 2	571	2.01			1.88	10			9	3203.68			2353.43
sp|P26599|PTBP1_HUMAN	Polypyrimidine tract-binding protein 1	531			2				10				2194.85
sp|P0CG48|UBC_HUMAN	Polyubiquitin-C	685	2	1.49			11	10			5024.76	7894.12
sp|Q9UHV9|PFD2_HUMAN	Prefoldin subunit 2	154			2				12				2230.39
sp|P20742|PZP_HUMAN	Pregnancy zone protein	1482	1.59		2		21		37		4405.15		7864.22
sp|P02545|LMNA_HUMAN	Prelamin-A/C	664	3.52	19.89	18.18	21.67	23	125	147	127	10259.1	56657.6	76917.4	43073
sp|P17844|DDX5_HUMAN	Probable ATP-dependent RNA helicase DDX5	614	4.08				21				7143.63
sp|Q15113|PCOC1_HUMAN	Procollagen C-endopeptidase enhancer 1	449	17.04	24.68	24.43	24.7	148	227	197	212	148812	344731	150462	265965
sp|Q02809|PLOD1_HUMAN	Procollagen-lysine,2-oxoglutarate 5-dioxygenase 1	727	7.08	10.31		12.46	27	51		62	6828.68	9725.74		12201
sp|P07737|PROF1_HUMAN	Profilin-1	140	9.4	8.7	11.04	11.04	53	65	108	65	17460.5	20715	46296.1	31372.1
sp|P35080|PROF2_HUMAN	Profilin-2	140			2	1.54			11	10			2466.18	1432.84
sp|P28799|GRN_HUMAN	Progranulin	593	5.4	11.54	15.48	16.28	31	75	108	139	6346.81	38653.9	40795.1	48767.6
sp|Q07954|LRP1_HUMAN	Prolow-density lipoprotein receptor-related protein 1	4544		7.08				35				2980.64
sp|P07602|SAP_HUMAN	Prosaposin	524		14.42		20.03		100		145		40924.5		45779.4
sp|P41222|PTGDS_HUMAN	Prostaglandin-H2 D-isomerase	190			4.04				33				5386.76
sp|P28066|PSA5_HUMAN	Proteasome subunit alpha type-5	241			2.07				13				749.755
sp|P60900|PSA6_HUMAN	Proteasome subunit alpha type-6	246		4	4.96	3.82		24	37	29		2388.73	6743.38	2931.86
sp|P20618|PSB1_HUMAN	Proteasome subunit beta type-1	241			3.33				21				6754.9
sp|P49721|PSB2_HUMAN	Proteasome subunit beta type-2	201			2.13				10				1592.89
sp|P49720|PSB3_HUMAN	Proteasome subunit beta type-3	205			2	2			12	10			535.294	604.412
sp|O60888|CUTA_HUMAN	Protein CutA	179	2	2	2		11	10	12		1511.52	623.284	3216.67
sp|P07237|PDIA1_HUMAN	Protein disulfide-isomerase	508	2	7.04	2.33	6.91	9	68	20	62	1832.84	12348.5	2482.11	8014.95
sp|P30101|PDIA3_HUMAN	Protein disulfide-isomerase A3	505	3.11	9.82	12.65	8.79	22	56	82	63	9339.46	19955.4	31334.1	25724.3
sp|Q15084|PDIA6_HUMAN	Protein disulfide-isomerase A6	440	4.18	8.01		10.01	22	63		60	2572.55	15866.2		16378.9
sp|P31949|S10AB_HUMAN	Protein S100-A11	105		2	2.01	2		12	11	11		1292.4	1187.74	1229.66
sp|Q96FQ6|S10AG_HUMAN	Protein S100-A16	103			1.93				9				2587.26
sp|P26447|S10A4_HUMAN	Protein S100-A4	101	2	2.03	2	2	10	14	13	12	1950	1434.8	1810.54	2305.15
sp|Q15436|SC23A_HUMAN	Protein transport protein Sec23A	765		1				9				1224.02
sp|Q99497|PARK7_HUMAN	Protein/nucleic acid deglycase DJ-1	189	2.01	2	3.26	2	13	40	37	13	1795.83	6395.34	6690.69	3272.79
sp|P22061|PIMT_HUMAN	Protein-L-isoaspartate(D-aspartate) O-methyltransferase	227			2				11				920.098
sp|P28300|LYOX_HUMAN	Protein-lysine 6-oxidase	417	6.77	6.17	11.98	9.03	48	49	108	79	8143.87	14028.9	20027.2	16696.3
sp|P01893|HLAH_HUMAN	Putative HLA class I histocompatibility antigen, alpha chain H	362	2.58	1.55	1.15	1.03	10	23	37	19	2077.21	5598.84	6680.56	5274.02
sp|P14618|KPYM_HUMAN	Pyruvate kinase PKM	531	4.04	11.47	19.17	19.16	24	88	126	122	5009.31	14254.9	35723.5	28877.5
sp|P50395|GDIB_HUMAN	Rab GDP dissociation inhibitor beta	445	5.93	2.06	8.84	5.61	36	11	52	33	5972.55	3472.79	9262.26	6360.05
sp|P51149|RAB7A_HUMAN	Ras-related protein Rab-7a	207			2				11				1041.42
sp|O75787|RENR_HUMAN	Renin receptor	350		2	2	4.08		13	12	29		556.127	627.941	1325.74
sp|Q15293|RCN1_HUMAN	Reticulocalbin-1	331		5.54		6.56		39		28		16193.4		14753.4
sp|Q96D15|RCN3_HUMAN	Reticulocalbin-3	328				2				12				601.716
sp|P52565|GDIR1_HUMAN	Rho GDP-dissociation inhibitor 1	204	4.68	6.22	6.01	6.74	27	39	34	35	2370.59	6190.44	4301.96	5259.31
sp|P38159|RBMX_HUMAN	RNA-binding motif protein, X chromosome	391				2				11				1555.64
sp|Q8N474|SFRP1_HUMAN	Secreted frizzled-related protein 1	314		1.66				9				1380.15
sp|O75326|SEM7A_HUMAN	Semaphorin-7A	666	2.23	2		2	12	13		10	2247.55	2697.06		1743.38
sp|Q92743|HTRA1_HUMAN	Serine protease HTRA1	480	2.2	2.51	2.65	6.23	13	17	16	25	3846.32	7855.15	6471.08	11437.5
sp|O75635|SPB7_HUMAN	Serpin B7	380	2.01			2	9			9	3057.35			2571.08
sp|P50454|SERPH_HUMAN	Serpin H1	418		15.95	7.71	12.64		128	65	102		36918.1	16580.9	25355.4
sp|O75368|SH3L1_HUMAN	SH3 domain-binding glutamic acid-rich-like protein	114		1.49	2	2		8	18	10		5382.35	10740.4	5334.8
sp|Q9H299|SH3L3_HUMAN	SH3 domain-binding glutamic acid-rich-like protein 3	93	2	2	4	2	10	17	31	15	2475	2300.74	6065.2	1987.01
sp|P62318|SMD3_HUMAN	Small nuclear ribonucleoprotein Sm D3	126			3.35				23				4999.26
sp|P09486|SPRC_HUMAN	SPARC	303		15.86		14.16		121		90		50787.3		33838
sp|P63208|SKP1_HUMAN	S-phase kinase-associated protein 1	163				2				11				1329.17
sp|Q9BUD6|SPON2_HUMAN	Spondin-2	331	2.66	4.34	4.11	5.43	13	49	37	63	9718.87	52298	17212.5	41103.9
sp|P52823|STC1_HUMAN	Stanniocalcin-1	247		2		2		11		10		1239.95		1232.11
sp|O76061|STC2_HUMAN	Stanniocalcin-2	302		2				10				952.206
sp|P16949|STMN1_HUMAN	Stathmin	149	2.01	2	2	2	10	13	17	11	1630.15	1506.37	3411.76	1465.69
sp|P38646|GRP75_HUMAN	Stress-70 protein, mitochondrial	679			2.01				10				1870.34
sp|P48061|SDF1_HUMAN	Stromal cell-derived factor 1	93		2		2		10		11		11820.8		9311.76
sp|P08254|MMP3_HUMAN	Stromelysin-1	477	33.66	20.88	26.86	30.98	386	299	321	390	842275	287591	310564	431230
sp|O00391|QSOX1_HUMAN	Sulfhydryl oxidase 1	747	12.86	20.98	28.41	25.09	61	163	243	177	33290.7	66954.4	91675	87253.7
sp|P00441|SODC_HUMAN	Superoxide dismutase [Cu-Zn]	154	2	2	2	2	12	12	13	11	2336.52	2381.13	4423.28	1925
sp|P04179|SODM_HUMAN	Superoxide dismutase [Mn], mitochondrial	222	4.71		6.67		32		43		3536.28		5277.21
sp|Q4LDE5|SVEP1_HUMAN	Sushi, von Willebrand factor type A, EGF and pentraxin domain-containing protein 1	3571		2.11		2.03		10		11		1134.8		559.804
sp|O00560|SDCB1_HUMAN	Syntenin-1	298	2.59			4.19	15			32	4800.98			6457.84
sp|Q9Y490|TLN1_HUMAN	Talin-1	2541		2.14	5.61	3.68		26	34	33		6977.2	4891.67	7351.47
sp|Q13148|TADBP_HUMAN	TAR DNA-binding protein 43	414	2				11				1514.46
sp|Q7Z7G0|TARSH_HUMAN	Target of Nesh-SH3	1075		4.75		2.69		20		10		2112.5		975.98
sp|P24821|TENA_HUMAN	Tenascin	2201		12.31	3.7	22.5		108	17	149		27795.1	3143.63	33221
sp|P05452|TETN_HUMAN	Tetranectin	202			2				13				752.696
sp|P10599|THIO_HUMAN	Thioredoxin	105			2.16				25				5218.87
sp|Q9BRA2|TXD17_HUMAN	Thioredoxin domain-containing protein 17	123	3.25	2.12	4.06	2.15	22	10	26	14	4180.64	3963.48	8060.05	3378.92
sp|Q8NBS9|TXND5_HUMAN	Thioredoxin domain-containing protein 5	432		2				11				2737.26
sp|Q16881|TRXR1_HUMAN	Thioredoxin reductase 1, cytoplasmic	649			1.55	2.03			9	10			1923.04	1293.14
sp|P30048|PRDX3_HUMAN	Thioredoxin-dependent peroxide reductase, mitochondrial	256	2.04	1.68	3.46		11	10	20		1825.49	1572.79	5550
sp|P07996|TSP1_HUMAN	Thrombospondin-1	1170	16.2	9.45	10.76	10.89	134	58	92	88	111047	34884.3	50838.5	46630.6
sp|P63313|TYB10_HUMAN	Thymosin beta-10	44	2	2	2	2	15	13	15	15	8358.82	6670.83	10767.9	7764.22
sp|P62328|TYB4_HUMAN	Thymosin beta-4	44	5.02	4.73	10	7.72	53	35	66	67	32268.6	22175.5	30115.9	35876
sp|P48307|TFPI2_HUMAN	Tissue factor pathway inhibitor 2	235				2.02				12				572.794
sp|Q15582|BGH3_HUMAN	Transforming growth factor-beta-induced protein ig-h3	683	22.45	14.64	27.27	19.32	256	160	361	214	144254	53428.7	148207	55908.1
sp|Q01995|TAGL_HUMAN	Transgelin	201		2.78	4.84	5.97		21	28	33		3025.49	4144.61	8178.43
sp|P37802|TAGL2_HUMAN	Transgelin-2	199		2.48	5.17	1.94		12	30	9		6294.12	8486.76	497.794
sp|P29401|TKT_HUMAN	Transketolase	623	2	4.2	7.95	2.22	13	25	37	13	1050.98	4337.99	4613.97	2295.83
sp|P60174|TPIS_HUMAN	Triosephosphate isomerase	286	8.55	9.61	14.14	12.72	63	106	184	102	20753.4	18785	55982.8	21103.4
sp|O14773|TPP1_HUMAN	Tripeptidyl-peptidase 1	563		7.7	2.04	5.83		52	14	56		17637.3	2597.3	11856.1
sp|P67936|TPM4_HUMAN	Tropomyosin alpha-4 chain	248		9.55	4.36	10.47		55	25	55		30186.8	3091.91	16770.1
sp|P23381|SYWC_HUMAN	Tryptophan--tRNA ligase, cytoplasmic	471		2.04		2.33		10		10		722.549		933.333
sp|P68363|TBA1B_HUMAN	Tubulin alpha-1B chain	451			2	2.7			15	16			1248.78	495.588
sp|Q13509|TBB3_HUMAN	Tubulin beta-3 chain	450				2.82				18				774.755
sp|O75347|TBCA_HUMAN	Tubulin-specific chaperone A	108				2				30				1697.3
sp|Q6IBS0|TWF2_HUMAN	Twinfilin-2	349		2.02	3.7	2		17	23	13		883.578	2171.08	802.696
sp|Q9GZX9|TWSG1_HUMAN	Twisted gastrulation protein homolog 1	223	1.85	1.49	2	2	11	9	14	14	1047.06	5162.74	2562.99	3254.41
sp|P09936|UCHL1_HUMAN	Ubiquitin carboxyl-terminal hydrolase isozyme L1	223	1.66	1.8	2	2	8	9	15	12	1803.92	1168.63	2871.32	2229.41
tr|A0A140TA62|A0A140TA62_HUMAN	Uncharacterized protein	436				4.47				47				17845.8
sp|P00749|UROK_HUMAN	Urokinase-type plasminogen activator	431		5.47		9.68		42		53		12268.4		13460.8
sp|P54727|RD23B_HUMAN	UV excision repair protein RAD23 homolog B	409		2	1.89	2		11	10	12		1811.52	1250.24	1816.18
sp|Q6EMK4|VASN_HUMAN	Vasorin	673	6.76	8.23	7.68	10.42	30	50	44	59	15292.6	20507.8	12652.2	18798.3
sp|P08670|VIME_HUMAN	Vimentin	466	51.93	55.99	69.67	69.94	645	932	1360	1063	851006	667864	1.37848e+06	920475
sp|P18206|VINC_HUMAN	Vinculin	1134			5.71	3.55			28	20			4509.8	1871.57
sp|P02774|VTDB_HUMAN	Vitamin D-binding protein	474			2				10				582.843
sp|Q15904|VAS1_HUMAN	V-type proton ATPase subunit S1	470	2.01	1.7	2.07		11	10	13		1645.83	2388.73	2991.91
sp|P12955|PEPD_HUMAN	Xaa-Pro dipeptidase	493		1.92				8				857.598

## Sheet: SM Figure S1
Supplementary material figure S1. Venn diagram of identified proteins overlapping between biological replicates
